# Supplementary material for: Incompatible effects of p53 and HDAC inhibition on p21 expression and cell cycle progression
Source: PubMed Central journal article supplement (PMC3613839; doi:10.1038/cddis.2013.61), 2013-03-07

# Supplementary Figure S1

**A**

**MCF7**

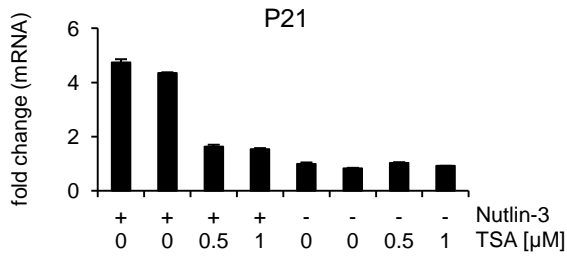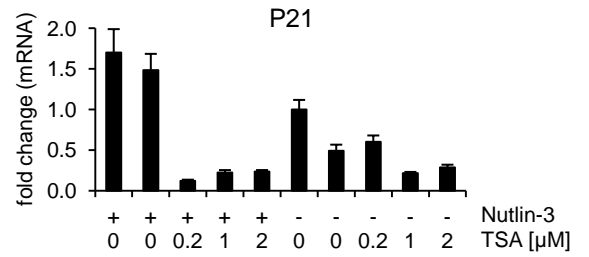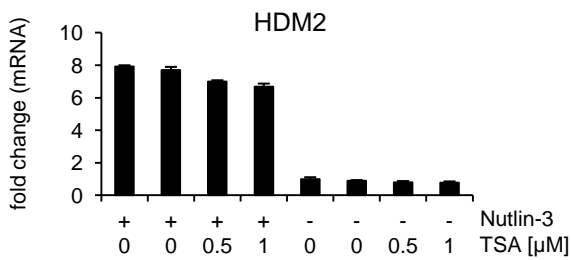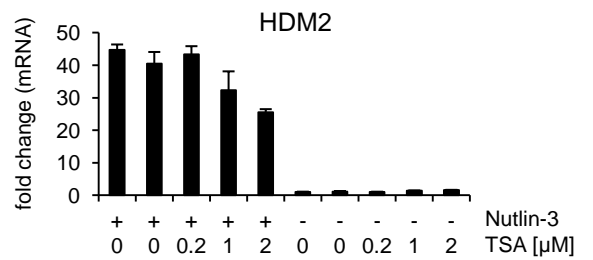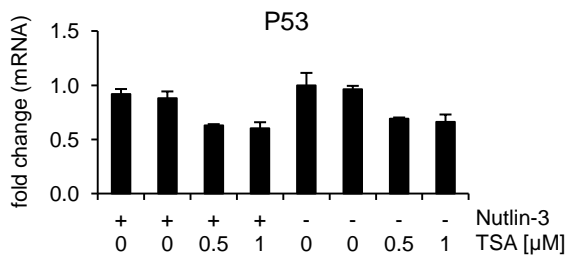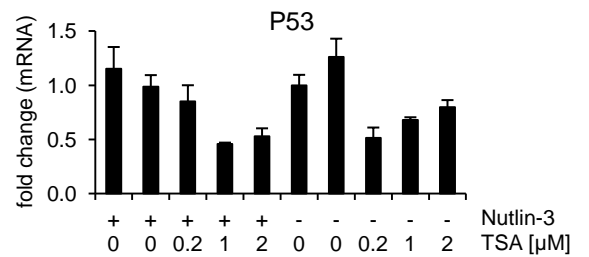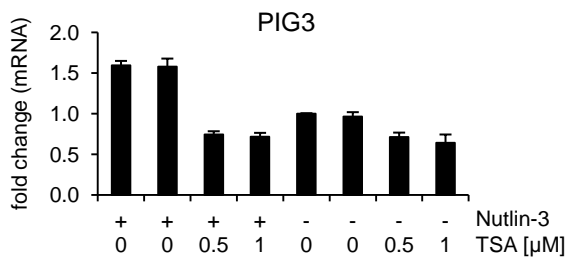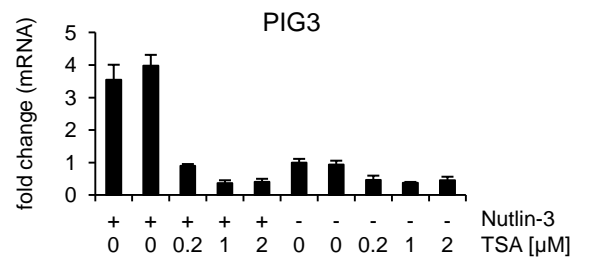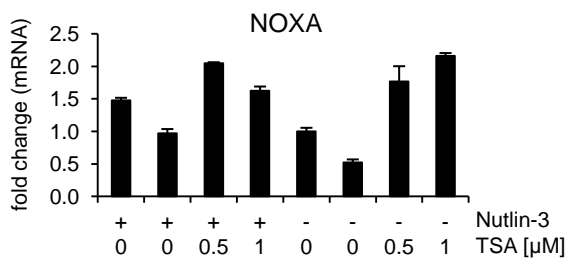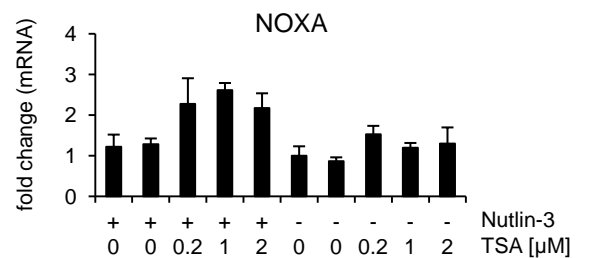

# Supplementary Figure S1 (continued)

**B**

**HNDF**

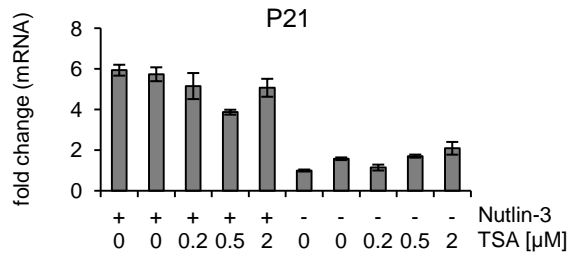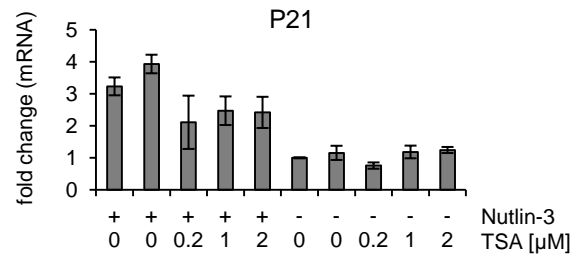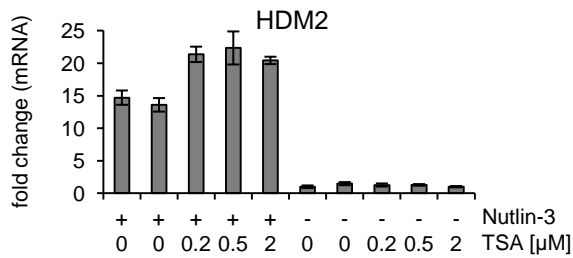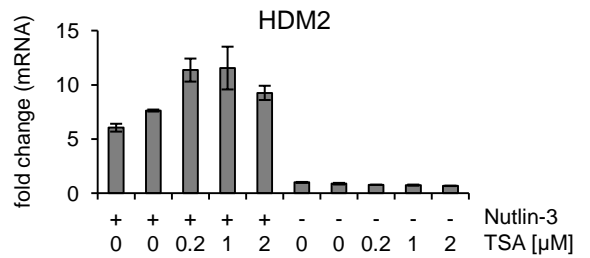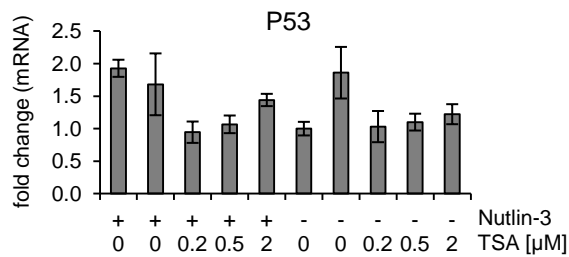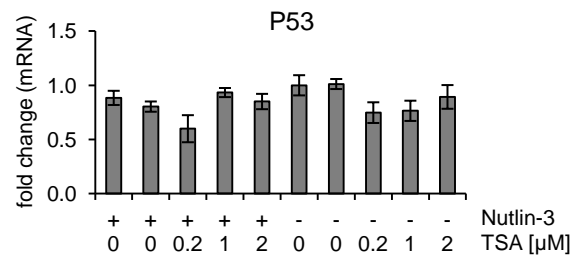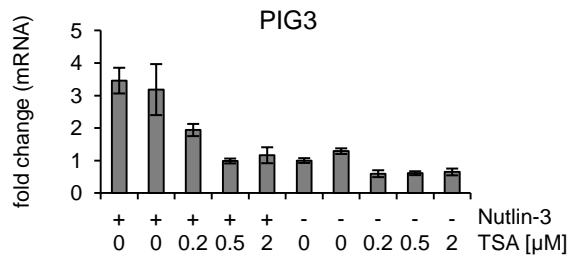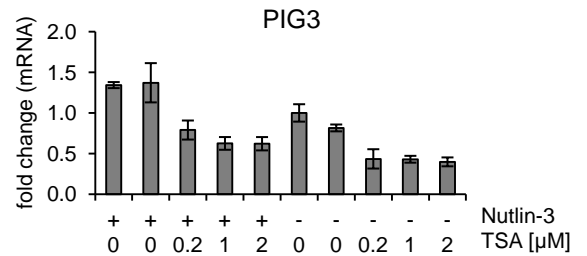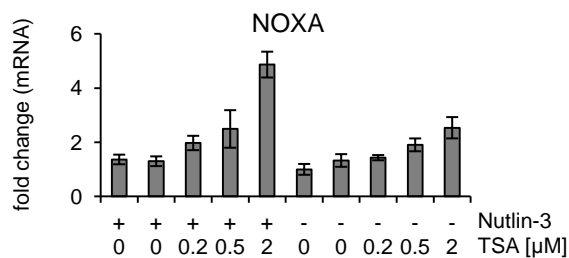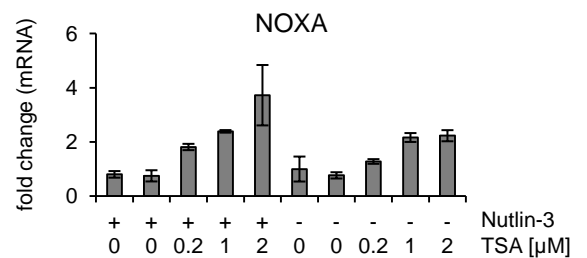

# Supplementary Figure S1 (continued)

**C**

**HCT116 p53<sup>+/+</sup>**

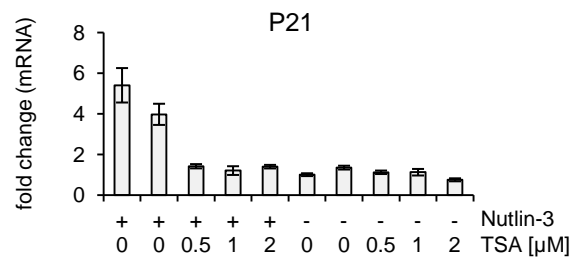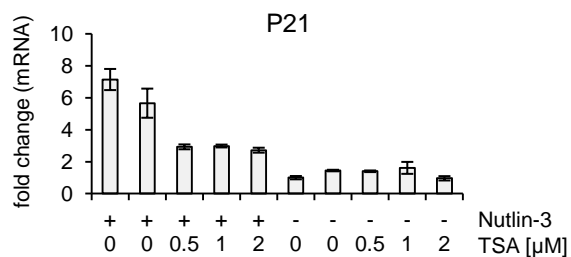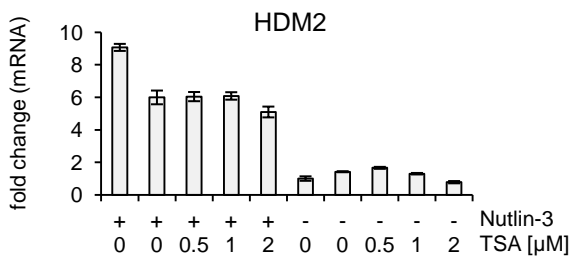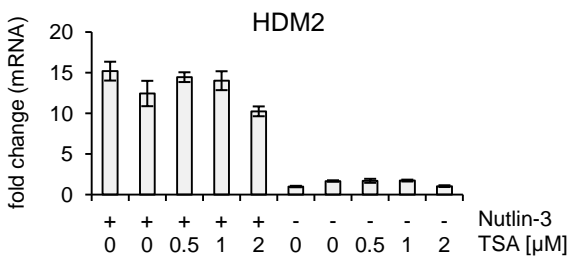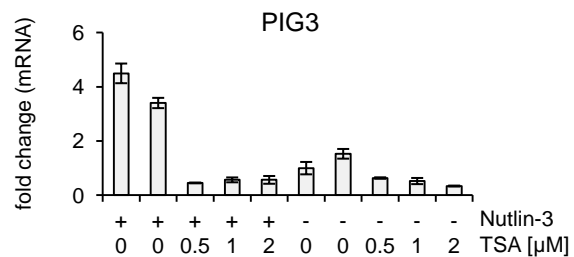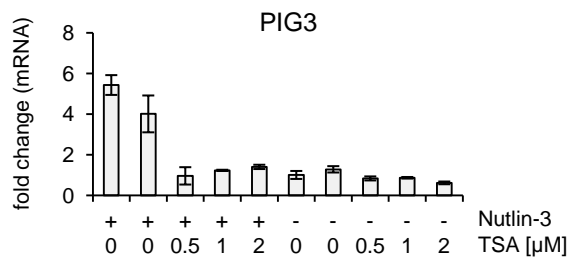

# Supplementary Figure S1 (continued)

**D**

**HCT116 p53<sup>-/-</sup>**

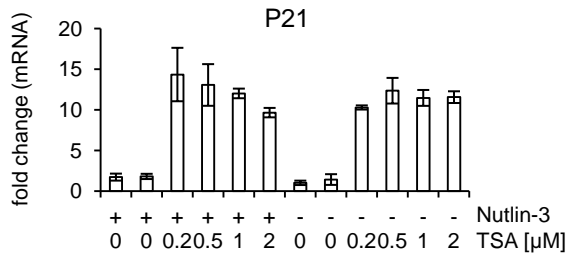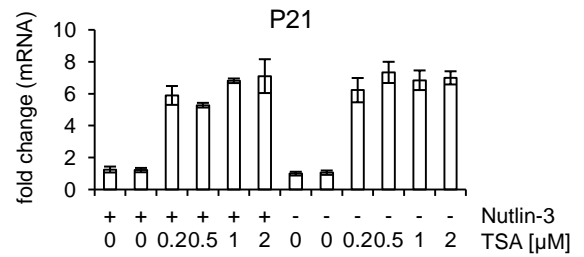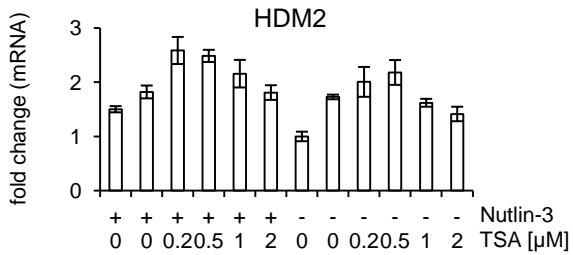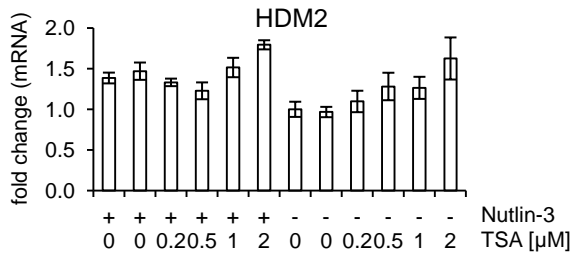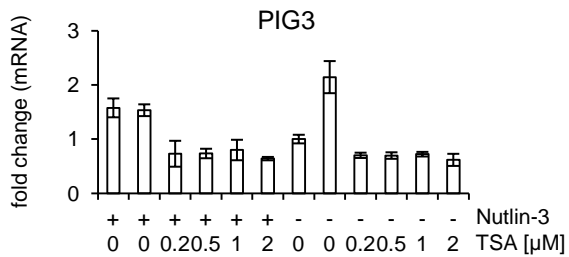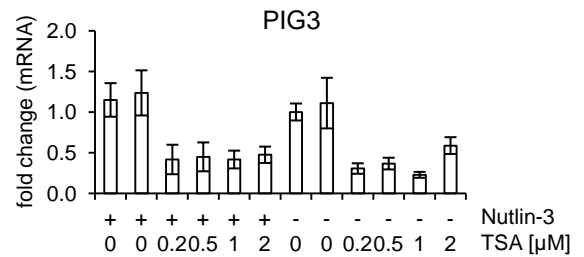

# Supplementary Figure S2

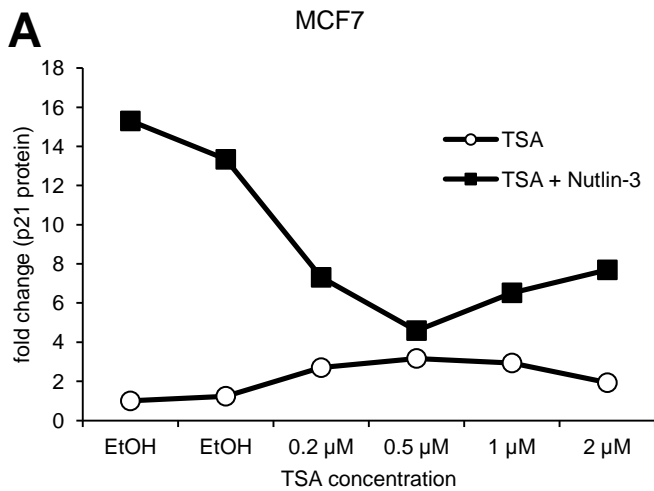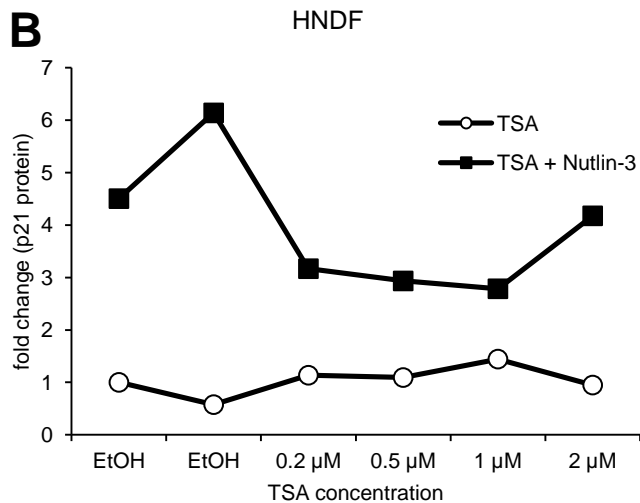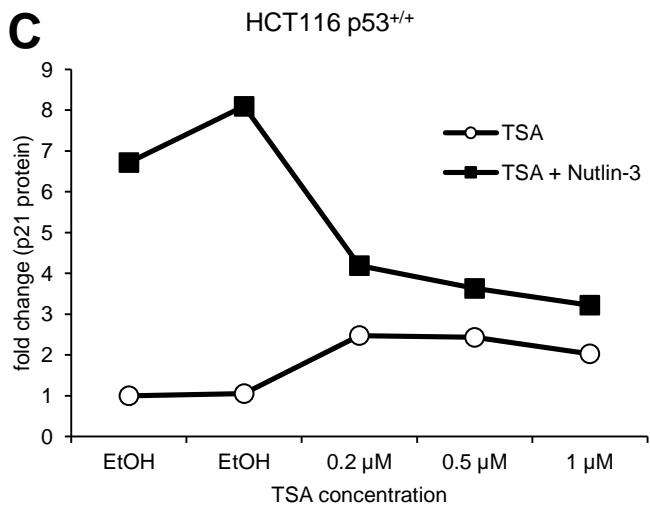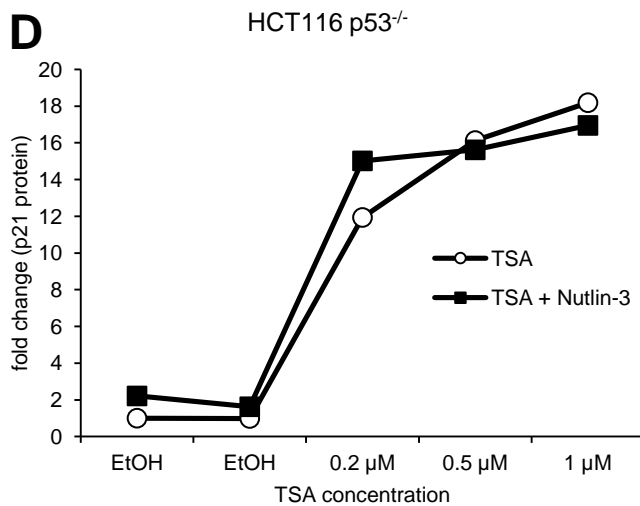

# Supplementary Figure S3

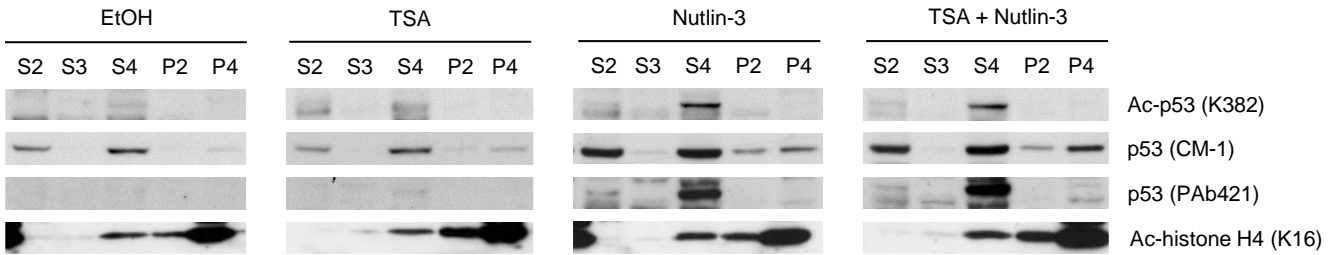

## Supplementary Figure S4

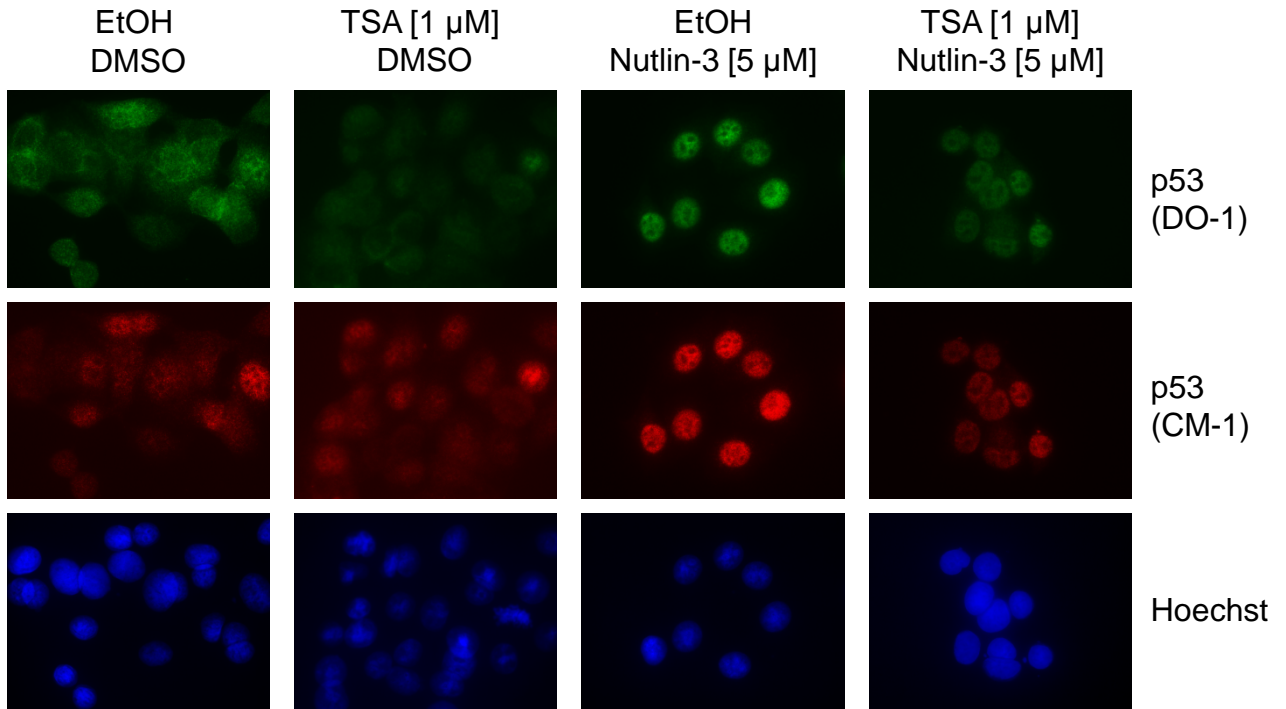

# Supplementary Figure S5

**A**

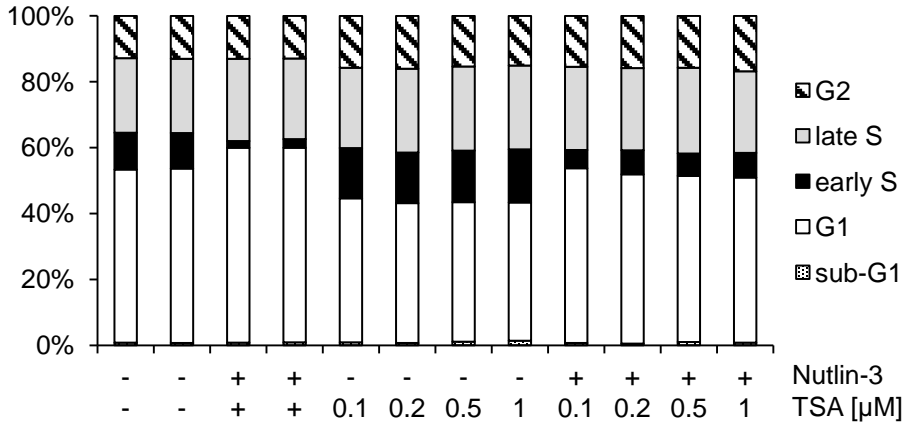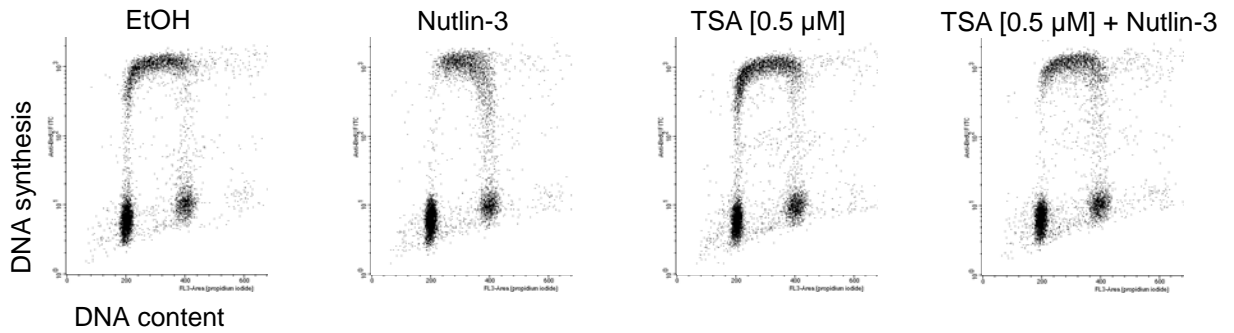

**B**

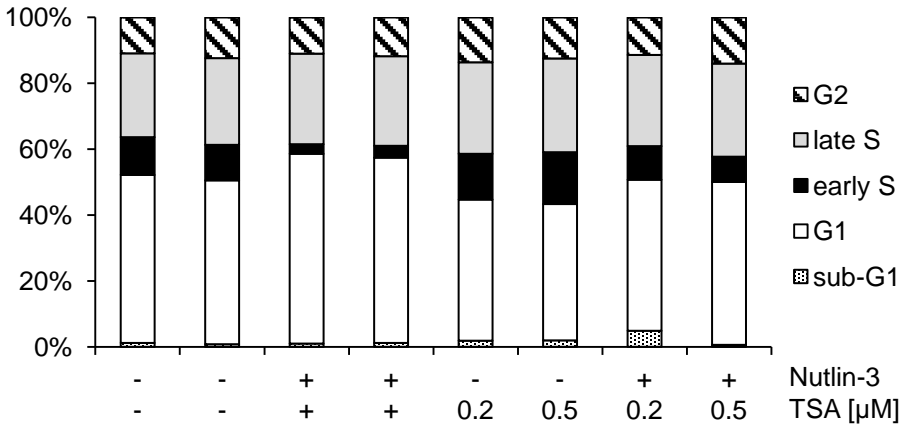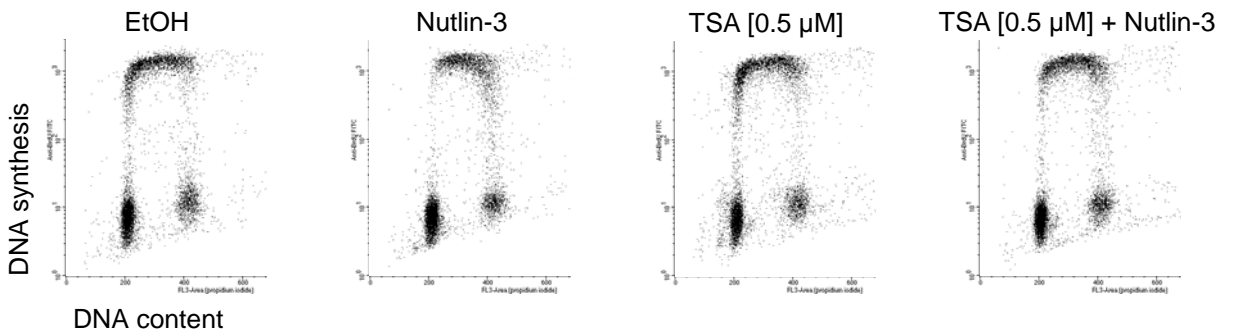



# Supplementary Figure S6

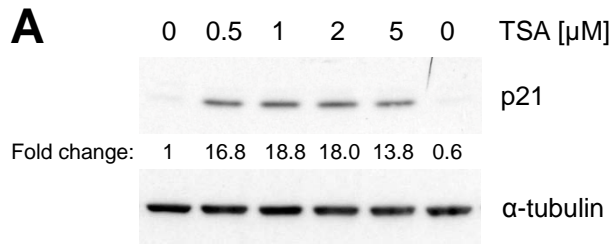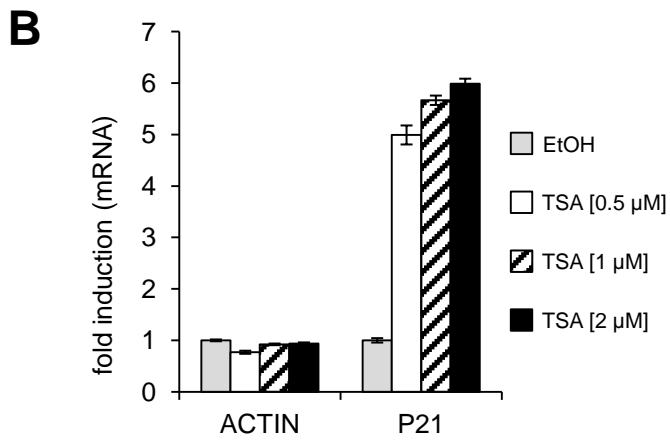

# Supplementary Figure S7

**A**HCT116 p53<sup>+/+</sup>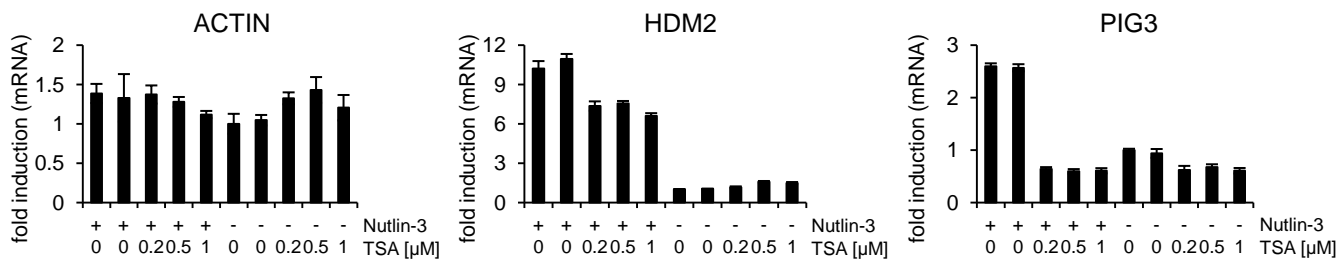**B**HCT116 p53<sup>-/-</sup>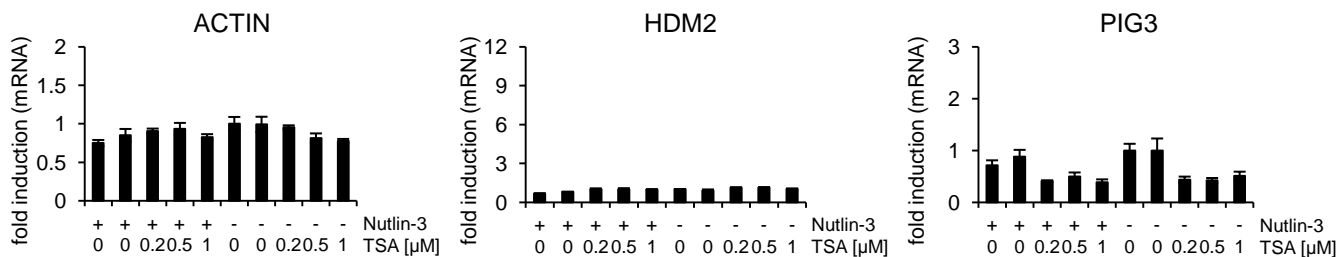

Supplement: cddis201361x1.pdf [file cddis201361x1.pdf]
